## RESEARCH ARTICLE

# How long is too long: A retrospective study evaluating the impact of the duration of noninvasive oxygenation support strategies (high flow nasal cannula & BiPAP) on mortality in invasive mechanically ventilated patients with COVID-19

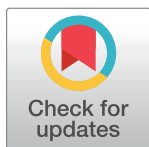

Aditya Kasarabada<sup>1\*</sup>, Kimberly Barker<sup>1</sup>, Theresa Ganoe<sup>1</sup>, Lindsay Clevenger<sup>1</sup>, Cristina Visco<sup>1</sup>, Jessica Gibson<sup>1</sup>, Rahim Karimi<sup>2</sup>, Negar Naderi<sup>1</sup>, Brian Lam<sup>2</sup>, Maria Stepanova<sup>2</sup>, Linda Henry<sup>2</sup>, Christopher King<sup>3</sup>, Mehul Desai<sup>1,2</sup>

**1** Medical Critical Care Service, Inova Fairfax Hospital, Falls Church, Virginia, United States of America,

**2** Medicine Service Line, Inova Health Systems, Falls Church, Virginia, United States of America,

**3** Department of Advanced Lung Disease and Transplant, Inova Fairfax Hospital, Falls Church, Virginia, United States of America

\* [Aditya.kasarabada@inova.org](mailto:Aditya.kasarabada@inova.org)

## OPEN ACCESS

**Citation:** Kasarabada A, Barker K, Ganoe T, Clevenger L, Visco C, Gibson J, et al. (2023) How long is too long: A retrospective study evaluating the impact of the duration of noninvasive oxygenation support strategies (high flow nasal cannula & BiPAP) on mortality in invasive mechanically ventilated patients with COVID-19. PLoS ONE 18(2): e0281859. <https://doi.org/10.1371/journal.pone.0281859>

**Editor:** Andrea Cortegiani, University of Palermo, ITALY

**Received:** October 11, 2022

**Accepted:** February 2, 2023

**Published:** February 16, 2023

**Copyright:** © 2023 Kasarabada et al. This is an open access article distributed under the terms of the [Creative Commons Attribution License](https://creativecommons.org/licenses/by/4.0/), which permits unrestricted use, distribution, and reproduction in any medium, provided the original author and source are credited.

**Data Availability Statement:** Our data are restricted by the Inova Health System internal review board due to HIPAA concerns (potentially sensitive information) and cannot be released without a data agreement with our institution. A data request can be requested through our Office of Research Operations. The following is the information needed for a request: Gity N. Porjosh, MPH, MBA Vice President, Research Operations

## Abstract

### Background/Aim

We investigated the association of noninvasive oxygenation support [high flow nasal cannula (HFNC) and BiPAP], timing of invasive mechanical ventilation (IMV), and inpatient mortality among patients hospitalized with COVID-19.

### Methods

Retrospective chart review study of patients hospitalized with COVID-19 (ICD-10 code U07.1) and received IMV from March 2020–October 2021. Charlson comorbidity index (CCI) was calculated; Obesity defined as body mass index (BMI)  $\geq 30$  kg/m<sup>2</sup>; morbid obesity was BMI  $\geq 40$  kg/m<sup>2</sup>. Clinical parameters/vital signs recorded at time of admission.

### Results

709 COVID-19 patients underwent IMV, predominantly admitted from March–May 2020 (45%), average age 62±15 years, 67% male, 37% Hispanic, and 9% from group living settings. 44% had obesity, 11% had morbid obesity, 55% had type II diabetes, 75% had hypertension, and average CCI was 3.65 (SD = 3.11). Crude mortality rate was 56%. Close linear association of age with inpatient-mortality risk was found [OR (95% CI) = 1.35 (1.27–1.44) per 5 years,  $p < 0.0001$ ]. Patients who died after IMV received noninvasive oxygenation support significantly longer: 5.3 (8.0) vs. 2.7 (SD 4.6) days; longer use was also independently associated with a higher risk of inpatient-mortality: OR = 3.1 (1.8–5.4) for 3–7 days, 7.2 (3.8–13.7) for  $\geq 8$  days (reference: 1–2 days) ( $p < 0.0001$ ). The association magnitude varied

Office of Research at Inova Health System 8095 Innovation Park Drive Building D #705 Fairfax, VA 22031.

**Funding:** The author(s) received no specific funding for this work.

**Competing interests:** The authors have declared that no competing interests exist.

between age groups: 3–7 days duration (ref: 1–2 days), OR = 4.8 (1.9–12.1) in  $\geq 65$  years old vs. 2.1 (1.0–4.6) in  $< 65$  years old. Higher mortality risk was associated with higher CCI in patients  $\geq 65$  ( $P = 0.0082$ ); among younger patients, obesity (OR = 1.8 (1.0–3.2) or morbid obesity (OR = 2.8; 1.4–5.9) ( $p < 0.05$ ) were associated. No mortality association was found for sex or race.

## Conclusion

Time spent on noninvasive oxygenation support [as defined by high flow nasal cannula (HFNC) and BiPAP] prior to IMV increased mortality risk. Research for the generalizability of our findings to other respiratory failure patient populations is needed.

## Introduction

SARS-CoV-2 is a novel respiratory coronavirus which can cause the infection now known as COVID-19 and can, in some cases, lead to death [1–7]. Among patients hospitalized with COVID-19, 20% progress to a severe disease state requiring invasive life support measures including invasive mechanical ventilation (IMV). However, when to initiate IMV among patients with ARDS has evolved over time.

At the beginning of the COVID-19 pandemic, patients were placed on IMV almost immediately. Questions then surfaced as to whether this mode of treatment was beneficial to patients or whether the use of noninvasive oxygenation support [as defined by high flow nasal cannula (HFNC) and BiPAP] should be considered as first-line treatment. As attention turned to the use of noninvasive oxygenation support strategies showing improved outcomes in prospective studies, other concerns were raised including the risk of infection transmission to healthcare workers through aerosolization [8]. In turn, these concerns lead to controversial recommendations provided by different scientific societies whereby noninvasive oxygenation support strategies in acute respiratory failure due to viral infection has been widely and variably used during the pandemic [8, 9].

Recently, a growing number of randomized controlled trials have tried to provide evidence on the effectiveness of noninvasive oxygenation support strategies in the management of COVID-19-associated acute hypoxemic respiratory failure [10–16]. However, these studies did not provide further guidance as to the duration of noninvasive oxygenation support methods before considering IMV. This is an especially important point as the work of breathing in those on noninvasive oxygenation support can cause significant damage to the pulmonary system such that using mechanical ventilation at a certain point may be futile among those who become intubated [8]. Therefore, the purpose of this study was to investigate the impact of the timing of IMV in conjunction with the use of noninvasive oxygenation support strategies [high flow nasal cannula (HFNC) and BiPAP] in patients who were hospitalized with COVID-19 and inpatient mortality.

## Methods

### Study design

This is a retrospective study. Data was obtained from our electronic health medical record (EMR) system (EPIC®) and was also retrieved from the health records using a case report form.

## Patient selection

All patients with a diagnosis of COVID-19 (ICD-10 code U07.1) who were hospitalized within Inova Health System, VA, USA between March 5<sup>th</sup>, 2020, and October 1<sup>st</sup>, 2021, received invasive mechanical ventilation (IMV) at any point during their admission and had a final discharge status at the time of the analysis were included. Each case was a unique case.

## Primary and secondary outcomes

The primary outcome of the study was inpatient mortality. The secondary outcome was to determine if there was a specific cut off period of time at which a patient receiving noninvasive oxygenation strategies [i.e. HFNC and/or BiPAP] should be considered for switching their respiratory support system to IMV.

## Study definitions

Using historic EMRs, we calculated the Charlson comorbidity index (CCI) for each patient using their medical history. Obesity was defined as a body mass index (BMI)  $\geq 30$  kg/m<sup>2</sup>, morbid obesity was defined as a BMI  $\geq 40$  kg/m<sup>2</sup>. Clinical parameters and vital signs were recorded at the time of admission during which mechanical ventilation occurred. Pre-intubation parameters included the number of days on noninvasive oxygenation support strategies before intubation which we defined as the number of days on BiPAP and/or the number of days spent on HFNC. We also collected other pertinent pre-intubation information which included: the use of vasodilators before intubation, Glasgow Coma Score (GCS) at intubation, and the PaO<sub>2</sub>/FiO<sub>2</sub> at intubation.

## Statistical analysis

Patients' parameters were summarized as N (%) or mean ( $\pm$ SD). Parameters were compared between groups using  $\chi^2$  or Kruskal-Wallis tests for categorical or continuous parameters, respectively. Logistic regression was used to identify parameters associated with the study outcome. Two-sided p-values  $<0.05$  were considered statistically significant.

SAS 9.4 (SAS Institute, Cary, NC) was used for all analyses.

The study was granted a waiver of consent and an exemption status by the Inova Health System's Institutional Review Board #U20-04-4025 given that all data were deidentified and analyzed anonymously.

## Results

There were 709 COVID-19 patients who underwent mechanical ventilation treatment and were included in this study. Patients were predominantly admitted during the first months of the pandemic (45% in March-May 2020), were, on average, 62 (SD = 15) years of age with 12% younger than 45, 67% male, 23% white, 17% black, 37% Hispanic, 15% Asian, and 9% from group living setting (nursing home, long-term care, rehabilitation facilities). Of the included patients, 44% had obesity, 11% had morbid obesity, 55% had documented history of type 2 diabetes, 75% had a history of hypertension, and average CCI calculated from pre-COVID-19 medical history was 3.65 (SD = 3.11).

The crude mortality rate for COVID-19 patients on IMV was 56% (Table 1). Of those who were discharged alive, 54% were discharged home and 38% to a long-term care facility. In comparison to those discharged alive, COVID-19 patients who died after being intubated were, on average, 11 years older, equally likely male or female, less commonly Hispanic, more commonly from group living settings and had a higher CCI ( $p<0.01$ ) (Table 1). In fact, there

Table 1. Comparison of patients who died vs. not died on mechanical ventilation.

|                                                    | Died         | Not died     | p       | All          |
|----------------------------------------------------|--------------|--------------|---------|--------------|
| N                                                  | 397 (56.0%)  | 312 (44.0%)  |         | 709          |
| <b>Admission period:</b>                           |              |              |         |              |
| Peak 1: March-May 2020                             | 161 (40.6%)  | 157 (50.3%)  | 0.0094  | 318 (44.9%)  |
| Plateau 1: June-October 2020                       | 51 (12.8%)   | 45 (14.4%)   | 0.54    | 96 (13.5%)   |
| Peak 2: November 2020-January 2021                 | 141 (35.5%)  | 61 (19.6%)   | < .0001 | 202 (28.5%)  |
| Plateau 2: February-September 2021                 | 44 (11.1%)   | 49 (15.7%)   | 0.07    | 93 (13.1%)   |
| Age, years                                         | 66.6 ± 13.2  | 55.3 ± 14.1  | < .0001 | 61.6 ± 14.7  |
| Male                                               | 263 (66.2%)  | 211 (67.6%)  | 0.70    | 474 (66.9%)  |
| Non-Hispanic white                                 | 100 (25.6%)  | 60 (19.4%)   | 0.0491  | 160 (22.9%)  |
| Black or African-American                          | 72 (18.5%)   | 44 (14.2%)   | 0.13    | 116 (16.6%)  |
| Hispanic                                           | 127 (32.4%)  | 134 (43.1%)  | 0.0036  | 261 (37.1%)  |
| Asian                                              | 53 (13.6%)   | 50 (16.1%)   | 0.35    | 103 (14.7%)  |
| Other race/ethnicity                               | 38 (9.7%)    | 22 (7.1%)    | 0.21    | 60 (8.6%)    |
| Admitted from group living <sup>a</sup>            | 50 (12.6%)   | 17 (5.4%)    | 0.0012  | 67 (9.4%)    |
| BMI, kg/m2                                         | 30.7 ± 8.4   | 30.2 ± 8.0   | 0.36    | 30.5 ± 8.2   |
| Obesity (BMI > 30)                                 | 173 (45.1%)  | 128 (42.1%)  | 0.44    | 301 (43.8%)  |
| Morbid obesity (BMI > 40)                          | 49 (12.8%)   | 28 (9.2%)    | 0.14    | 77 (11.2%)   |
| Type 2 diabetes                                    | 231 (58.2%)  | 157 (50.3%)  | 0.0367  | 388 (54.7%)  |
| Hypertension                                       | 314 (79.1%)  | 218 (69.9%)  | 0.0049  | 532 (75.0%)  |
| Cirrhosis                                          | 15 (3.8%)    | 5 (1.6%)     | 0.08    | 20 (2.8%)    |
| Charlson's comorbidity index (CCI)                 | 4.43 ± 3.22  | 2.66 ± 2.64  | < .0001 | 3.65 ± 3.11  |
| <b>Healthcare resource utilization:</b>            |              |              |         |              |
| Length of inpatient stay, days <sup>b</sup>        | 19.9 ± 15.7  | 30.8 ± 20.8  | < .0001 | 24.7 ± 18.9  |
| Placed on ECMO                                     | 24 (6.0%)    | 45 (14.4%)   | 0.0002  | 69 (9.7%)    |
| Had inpatient hospice status <sup>c</sup>          | 43 (10.8%)   | 2 (0.6%)     | < .0001 | 45 (6.3%)    |
| <b>Pre-intubation parameters:</b>                  |              |              |         |              |
| Received HFNC                                      | 233 (64.5%)  | 154 (57.5%)  | 0.07    | 387 (61.5%)  |
| Received BiPAP                                     | 143 (41.0%)  | 57 (21.7%)   | < .0001 | 200 (32.7%)  |
| Total # days on noninvasive oxygenation strategies | 5.27 ± 8.04  | 2.68 ± 4.65  | < .0001 | 4.17 ± 6.91  |
| # days on HFNC                                     | 3.62 ± 5.45  | 2.03 ± 3.49  | 0.0002  | 2.94 ± 4.78  |
| # days on BiPAP                                    | 1.76 ± 5.02  | 0.77 ± 2.31  | < .0001 | 1.33 ± 4.11  |
| Vasodilators before intubation                     | 75 (19.9%)   | 50 (16.9%)   | 0.33    | 125 (18.6%)  |
| Glasgow coma score (GCS) at intubation             | 12.1 ± 4.2   | 12.8 ± 3.8   | 0.0033  | 12.4 ± 4.1   |
| Initial peak pressure, mmHg                        | 27.8 ± 8.1   | 26.9 ± 7.0   | 0.08    | 27.4 ± 7.6   |
| Plateau peak pressure, mmHg                        | 25.4 ± 6.8   | 24.2 ± 6.1   | 0.0197  | 24.8 ± 6.5   |
| PaO2/ FiO2 at intubation                           | 126.3 ± 86.6 | 154.8 ± 97.8 | < .0001 | 138.5 ± 92.6 |

<sup>a</sup> group living includes those admitted from nursing home, long-term care facility, etc

<sup>b</sup> it is the total length of inpatient stay including outside of ICU

<sup>c</sup> the proportion of those who eventually moved to that status before discharged or died. ECMO- extracorporeal membrane oxygenation; HFNC- high flow nasal cannula; BiPAP-Bilevel positive airway pressure; PaO2- partial pressure of oxygen in the arterial blood; FIO2-fraction of inspired oxygen; BMI- body mass index

<https://doi.org/10.1371/journal.pone.0281859.t001>

was a linear association of age with the risk of inpatient mortality for intubated patients with COVID-19 (OR (95% CI) = 1.35 (1.27–1.44) per 5 years,  $p < 0.0001$ ); that rate exceeded 50% for patients  $\geq 65$  years of age (Fig 1). In contrast, patients who were discharged alive incurred a longer length of inpatient stay and a higher rate of Extracorporeal membrane oxygenation (ECMO) utilization ( $p < 0.01$ ) (Table 1).

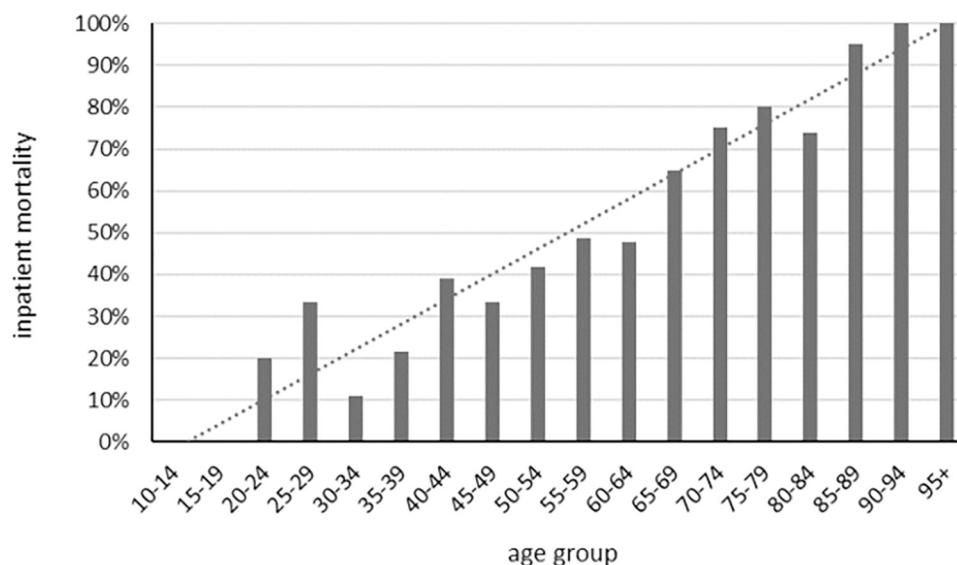

**Fig 1. Linear association of inpatient mortality and age for COVID-19 patients on mechanical ventilation.**

<https://doi.org/10.1371/journal.pone.0281859.g001>

Considering pre-intubation parameters, patients who eventually died after intubation had received noninvasive oxygenation support strategies for a substantially longer period: mean (SD) 5.3 (8.0) vs. 2.7 (SD 4.6) days; that included longer duration of both nasal canula and BiPAP methods ( $p < 0.01$ ) (Table 1). Those patients also had lower GCS and PaO<sub>2</sub>/FiO<sub>2</sub> ratio at intubation ( $p < 0.01$ ) although there was no difference in the rates of vasodilators use ( $p > 0.05$ ) (Table 1).

The crude mortality rate for IMV patients with COVID-19 was the highest during the winter of 2020–2021: 70% vs. 47–53% in other periods ( $p < 0.0001$ ) (S1 Table). That period was also associated with the highest mean age (65 vs. 62 overall) and CCI (3.9 vs. 3.6 overall) as well as the longest duration of pre-intubation respiratory support (mean 6.3 days vs. 4.2 days overall), the highest rate of BiPAP utilization (49% vs. 33% overall), and the lowest PaO<sub>2</sub>/FiO<sub>2</sub> ratio (mean 125 vs. 139 overall) ( $p < 0.01$ ) (S1 Table).

Since there was a strong association between the duration of noninvasive oxygenation support strategies and post-intubation mortality (Table 1), we further assessed this association (Fig 2A). As a result, we found that patients who received noninvasive oxygenation support treatment (HFNC and BiPAP combined) for only 1 or 2 days had the lowest mortality rate of 37%, but that rate increased to 68% for patients who received noninvasive oxygenation support for 3–7 days and further increased to 78% for patients who had been on noninvasive oxygenation support for 8 or more days (Fig 2A, S2 Table). Finally, patients who had received no noninvasive oxygenation support [ $< 1$  day; zero days = mechanically intubated on admission] had a mortality rate of 52% (Fig 2A, S2 Table).

Since patients who had received noninvasive oxygenation support for only 1–2 days were the youngest of all (mean age 58 years vs. 64 years for patients who had received it for 3 days or longer), we additionally assessed the association of duration of noninvasive oxygenation support with the outcome stratified by age. As a result, we found that this association was indeed strongly mediated by age (Fig 2B). Specifically, patients in the  $< 65$  age group had a mortality rate of 26% if intubation followed 1–2 days on noninvasive oxygenation support; that rate increased to 48% for patients intubated after 3–7 days of noninvasive oxygenation support, and then to 73% for intubation after 8 or more days noninvasive oxygenation support (Fig 2B). In contrast, in patients of  $\geq 65$  years of age, the lowest mortality rate was 57% if intubated

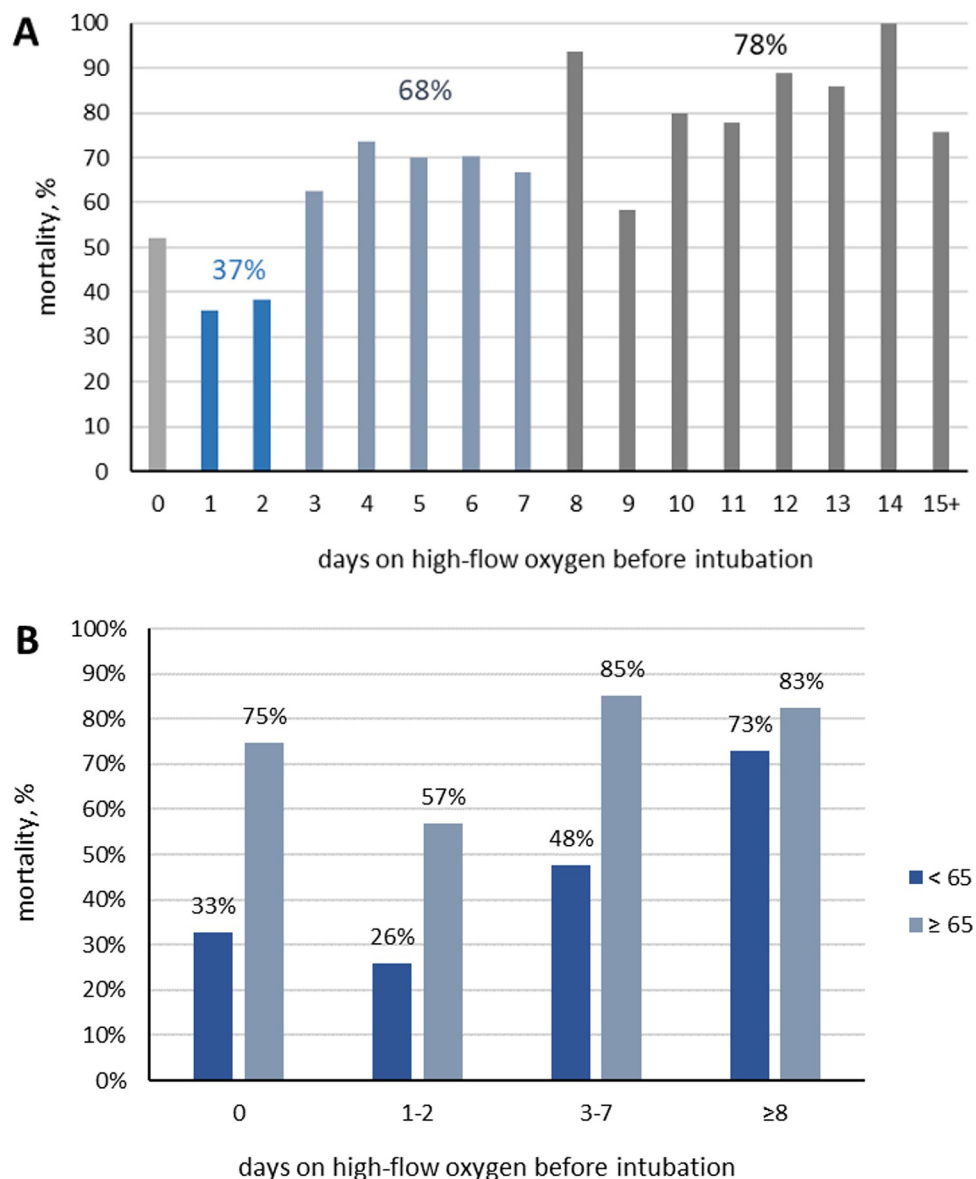

**Fig 2. Inpatient mortality was higher with longer use of high flow oxygenation before intubation.** (A) Inpatient mortality vs days on noninvasive oxygenation support differed across time intervals: Lowest for 1–2 days, higher for 3–7 days, and highest for 8+ days. (B) Inpatient mortality vs days on noninvasive oxygenation support stratified into 2 age groups: Age < 65 years and age ≥ 65 years. For younger group, differences in mortality for 1–2 days, 3–7 days, and 8+ days. For older group, differences in mortality in 1–2 days and 3+ days only.

<https://doi.org/10.1371/journal.pone.0281859.g002>

after 1–2 days on noninvasive oxygenation support; that rate increased to 83–85% for patients intubated after 3 or more days of noninvasive oxygenation support, without any additional association with the duration (Fig 2B).

In multivariate analysis, increased time on noninvasive oxygenation support was independently associated with a higher risk of post-intubation mortality: OR (95% CI) = 3.1 (1.8–5.4) for 3–7 days, 7.2 (3.8–13.7) for ≥8 days (reference: 1–2 days) ( $p < 0.0001$ ) (Table 2). As seen in the univariate analysis discussed above, the magnitude of this association was found to vary between age groups: for 3–7 days duration (ref: 1–2 days), OR = 4.8 (1.9–12.1) in ≥65 years



**Table 2. Independent predictors of inpatient mortality in COVID-19 patients on mechanical ventilation.**

| predictor                                                                         | OR (95% CI)       | p       |
|-----------------------------------------------------------------------------------|-------------------|---------|
| Admission period (ref: off-peak periods)                                          |                   |         |
| Peak 1 (March-May 2020)                                                           | 1.49 (0.94–2.38)  | 0.09    |
| Peak 2 (November 2020-January 2021)                                               | 2.37 (1.40–4.02)  | 0.0014  |
| Age (ref: <45 years)                                                              |                   |         |
| 45–54 years                                                                       | 0.76 (0.39–1.46)  | 0.41    |
| 55–64 years                                                                       | 1.02 (0.55–1.87)  | 0.96    |
| 65–74 years                                                                       | 1.96 (1.04–3.68)  | 0.0373  |
| ≥75 years                                                                         | 2.52 (1.19–5.34)  | 0.0157  |
| Male sex (ref: female)                                                            | 1.25 (0.83–1.88)  | 0.30    |
| CCI (ref: 0–2)                                                                    |                   |         |
| CCI = 3–4                                                                         | 1.69 (0.99–2.88)  | 0.05    |
| CCI = 5–8                                                                         | 2.18 (1.26–3.78)  | 0.0053  |
| CCI ≥ 9                                                                           | 4.13 (1.78–9.55)  | 0.0009  |
| Obesity (BMI > 30)                                                                | 1.54 (1.01–2.36)  | 0.0457  |
| Morbid obesity (BMI > 40)                                                         | 2.16 (1.13–4.14)  | 0.0198  |
| Cirrhosis                                                                         | 6.47 (1.64–25.54) | 0.0077  |
| Total # days on noninvasive oxygenation support before intubation (ref: 1–2 days) |                   |         |
| 0 days                                                                            | 1.63 (0.97–2.75)  | 0.07    |
| 3–7 days                                                                          | 3.09 (1.76–5.42)  | < .0001 |
| ≥8 days                                                                           | 7.23 (3.82–13.67) | < .0001 |
| GCS at intubation, per 1 point                                                    | 0.94 (0.89–0.99)  | 0.0230  |

CCI- Charlson Comorbidity Scale; GCS- Glasgow Coma Scale

<https://doi.org/10.1371/journal.pone.0281859.t002>

old vs. 2.1 (1.0–4.6) in <65 years old; for ≥8 days duration (ref: 1–2 days), OR = 5.3 (2.0–13.9) in ≥65 years old vs. 8.6 (3.7–20.0) for <65 years old (**Table 3**).

Other independent predictors of post-intubation mortality in COVID-19 also varied between the age groups. Specifically, in the older age group, the association of the outcome with the period of admission was significant; patients ≥65 were more likely to die if admitted during local peaks of infections and hospitalizations (spring 2020 and winter 2020–2021): OR = 2.25 (1.06–4.79) and 3.07 (1.38–6.84), respectively (both  $p < 0.05$ ); in contrast, there was no such association for patients <65 (both  $p > 0.05$ ) (**Table 3**). The association of a relatively older age with mortality was observed in the <65 group only (55–64 vs. <55) while association with higher CCI was increasingly significant only in patients ≥65 (**Table 3**). At the same time, younger patients were marginally at higher risk of mortality if obese (OR = 1.76 (0.97–3.20,  $P = 0.06$ ) but significantly at risk if morbidly obese (OR = 2.8 (1.4–5.9,  $p < 0.01$ ) while no such association was found in the older age group ( $p > 0.05$ ) (**Table 3**). Finally, after adjustment for these factors, no association of post-intubation mortality with sex or race was found in either age group (all  $p > 0.05$ ).

## Discussion

Although IMV can be a life-saving treatment for those with COVID-19, we found that among patients with severe ARDS, the timing of when to initiate this mode of ventilation is vital, especially for those 65 years and older. As noted in our analysis of over 700 patients with COVID-19 who received IMV, the use of noninvasive oxygenation support strategies for greater than

**Table 3. Independent predictors of inpatient mortality in COVID-19 patients on mechanical ventilation by age group.**

| period                                                                              | OR (95% CI)       | p       |
|-------------------------------------------------------------------------------------|-------------------|---------|
| Age group: $\geq 65$ years                                                          |                   |         |
| Admission period (ref: off-peak periods)                                            |                   |         |
| Peak 1 (March-May 2020)                                                             | 2.25 (1.06–4.79)  | 0.0352  |
| Peak 2 (November 2020-January 2021)                                                 | 3.07 (1.38–6.84)  | 0.0062  |
| Age $\geq 75$ (ref: age 65–74)                                                      | 0.97 (0.49–1.91)  | 0.93    |
| Male sex                                                                            | 0.99 (0.52–1.91)  | 0.98    |
| CCI = 3–4 (ref: CCI $\leq 2$ )                                                      | 2.37 (0.93–6.03)  | 0.07    |
| CCI = 5–8 (ref: CCI $\leq 2$ )                                                      | 2.81 (1.11–7.15)  | 0.0300  |
| CCI $\geq 9$ (ref: CCI $\leq 2$ )                                                   | 4.59 (1.48–14.2)  | 0.0082  |
| Obesity (BMI > 30)                                                                  | 1.29 (0.67–2.50)  | 0.45    |
| Morbid obesity (BMI > 40)                                                           | 0.94 (0.21–4.33)  | 0.94    |
| Total # days on noninvasive oxygenation support prior to intubation (ref: 1–2 days) |                   |         |
| 0 days                                                                              | 1.86 (0.82–4.25)  | 0.14    |
| 3–7 days                                                                            | 4.79 (1.90–12.08) | 0.0009  |
| $\geq 8$ days                                                                       | 5.27 (2.00–13.91) | 0.0008  |
| GCS at intubation, per 1 point                                                      | 0.92 (0.85–1.01)  | 0.07    |
| Age group: <65 years                                                                |                   |         |
| Admission period (ref: off-peak periods)                                            |                   |         |
| Peak 1 (March-May 2020)                                                             | 1.06 (0.57–1.99)  | 0.86    |
| Peak 2 (November 2020-January 2021)                                                 | 1.76 (0.84–3.69)  | 0.13    |
| Age 55–64 (ref: age <55)                                                            | 1.84 (1.06–3.19)  | 0.0294  |
| Male sex                                                                            | 1.58 (0.88–2.84)  | 0.13    |
| CCI = 3–4 (ref: CCI $\leq 2$ )                                                      | 1.12 (0.54–2.30)  | 0.76    |
| CCI = 5–8 (ref: CCI $\leq 2$ )                                                      | 1.03 (0.44–2.43)  | 0.94    |
| CCI $\geq 9$ (ref: CCI $\leq 2$ )                                                   | 1.42 (0.23–8.66)  | 0.70    |
| Obesity (BMI > 30)                                                                  | 1.76 (0.97–3.20)  | 0.06    |
| Morbid obesity (BMI > 40)                                                           | 2.83 (1.35–5.94)  | 0.0061  |
| Cirrhosis                                                                           | 8.32 (1.9–36.52)  | 0.0050  |
| Total # days on noninvasive oxygenation support before intubation (ref: 1–2 days)   |                   |         |
| 0 days                                                                              | 1.37 (0.67–2.79)  | 0.39    |
| 3–7 days                                                                            | 2.15 (1.01–4.60)  | 0.0483  |
| $\geq 8$ days                                                                       | 8.6 (3.71–19.97)  | < .0001 |
| GCS at intubation, per 1 point                                                      | 0.98 (0.91–1.06)  | 0.61    |

CCI- Charlson Comorbidity Scale; GCS- Glasgow Coma Scale; BMI-Body Mass Index

<https://doi.org/10.1371/journal.pone.0281859.t003>

seven days increased the mortality substantially, regardless of a patient's prior comorbidity status.

However, on closer observation of the data, the effect of noninvasive oxygenation support strategies was mediated by age. Patients 65 years and older saw a substantial increase in mortality if they were on this modality for more than two days before being intubated and mechanically ventilated. In contrast, patients who were 64 years and younger had up to seven days in which they could receive noninvasive oxygenation support before seeing a substantial increase in mortality. It is worth noting that regardless, the mortality risk in this patient population also began to increase after two days on this modality. Our finding is somewhat different than an earlier report which indicated that those who received IMV within their first two days had a



higher mortality than those who were intubated later in their hospitalization [17]. However, the authors did find that for those who eventually needed IMV, their mortality was higher which is in line with our results. The investigators, as well, determined that the exact timing of the use of IMV in those with COVID-19 induced respiratory failure is very complex as we note in this study [17].

Such a finding does make sense, as the work of breathing with high-flow oxygen can cause significant lung and airway damage to the point that the use of mechanical ventilation to deliver oxygen is no longer a viable option [18]. In recent studies, respiratory efforts among some patients with COVID-19 who were breathing spontaneously have been shown to cause significant lung damage similar to ventilator-induced lung injury from high pressures- a situation known as self-inflicted lung injury (P-SILI) [18–20]. We suggest that the use of noninvasive oxygenation support in those who meet severe ARDS criteria be carefully considered when weighing each oxygenation system's known risks and benefits.

Another interesting finding from this study is that the use of BiPAP significantly differed between patients who died and those who survived. Patients who died received approximately one-day longer of BiPAP compared to those who did not die. This was not the aim of our study; however, this finding is in line with a recent study that demonstrated that the use of a high-flow nasal cannula may provide better survival from mechanical ventilation than BiPAP [21, 22]. These patients also appeared to have already received a longer duration of HFNC prior to being placed on BiPAP, so we suggest that the combined duration may be affecting the outcome. Further study is warranted to determine the best noninvasive support delivery device to use (i.e. HFNC vs BiPAP).

We also noted that the other predictors for mortality differed by age. In patients 65 years and older, the greater the number of comorbidities present on admission for COVID-19, the higher the risk of death. Admission during the peaks of COVID-19 was also associated with a higher risk of death. For patients younger than 65, neither the comorbidity burden nor being admitted during the peaks of COVID-19 were significant risk factors. However, morbid obesity ( $\text{BMI} \geq 40$ ) increased the risk of dying three-fold.

Morbid obesity has been identified as a predictor of mortality in other studies [23, 24]. Our study highlights its impact on those under the age of 65 regardless of other comorbidities present, which helps to confirm a prior study where morbid obesity was also found to be a significant risk factor for those 50 years and younger [25]. Studies on the interaction of obesity and COVID-19 continue; it is hypothesized that patients with obesity have impaired immune responses and abnormal secretion of proinflammatory cytokines such as interleukin 6 (IL-6), which are already present due to COVID-19, worsening the disease. Morbid obesity may also cause a decrease in the lungs' functional residual capacity, causing hypoxemia, while the expression of angiotensin-converting enzyme 2 (ACE2) from the adipose tissue also has a high affinity to SARS-CoV-2, which may increase the virality of COVID-19 [26–30].

The increased mortality during the two peaks of COVID-19 highlighted in this study can partially be explained by the current respiratory management principles at each corresponding time point. During the first peak, we used IMV on most patients per the recommendations before studies found that IMV should not be the first line of treatment. As such, the second peak captures the use of the recommended noninvasive oxygenation support prior to IMV. However, as noted in our study, the length of time on noninvasive oxygenation support may have been detrimental, whereby attention to the time on high flow for patients who continue in respiratory distress despite therapy should be considered when deciding on the use of IMV.

These latter points are essential even though COVID-19 has evolved and changed in its lethality, partially due to new treatments and the availability of vaccines to ward off severe illness. However, in the United States, COVID-19 is still active; the reported 7-day daily average

for COVID-19-related hospitalizations is close to 4000 (Sept 2022) with almost 400 COVID-19-related deaths reported as a 7-day moving average [31]. It is disturbing to note that patients 65 years and older now make up over 50% of hospitalizations, which was not the case previously. Therefore, we suggest that given our findings, if noninvasive oxygenation support is considered a treatment option, careful thought is still warranted when determining how much time should be spent on noninvasive oxygenation support prior to IMV among the sickest patients.

Furthermore, more research is needed on the use of, and length of time spent on noninvasive oxygenation support among patients who develop ARDS for reasons outside of COVID-19 to determine if our findings are valid in another patient population. This suggestion is vital given prior studies that reported similar results to ours for those with acute respiratory failure [32, 33]. A recent study conducted among cancer patients requiring intensive oxygen therapy for acute respiratory failure found that a longer duration of noninvasive oxygenation support use (3 days or more) before intubation increased mortality risk by almost 8 times [33].

## Limitations

There are several limitations to the study. This is a retrospective, single health system review of data which may limit the generalizability of the results. There is a potential for selection bias as the outcome of mechanical ventilation was the inclusion criteria for this cohort. Patient selection for mechanical ventilation in COVID-19 changed as the pandemic evolved, leading to differing approaches for noninvasive oxygenation support prior to intubation. As mentioned previously, early in the pandemic, patients were intubated and placed on mechanical ventilation early in the time course of the disease. During the second wave, more patients were placed on noninvasive methods of oxygenation and for longer durations prior to intubation for IMV. Nevertheless, we accounted for each wave of COVID-19 in our multivariate analysis, and time spent on noninvasive oxygenation support remained significant, suggesting that despite a change in guidelines, the length of time spent on noninvasive oxygenation support prior to IMV increased the risk of mortality. Data were abstracted from chart review, which depends on the strength and quality of the original documentation.

## Conclusion

As the COVID-19 pandemic continues to evolve, so does our understanding of treating those who experience ARDS. In this study, we found that among those who received IMV, the most significant predictor for in-hospital mortality was the length of time spent on noninvasive oxygenation support prior to IMV, such that the more time spent on noninvasive oxygenation support, the higher the odds of dying. However, the effect of time spent on noninvasive oxygenation support was mediated by age. Patients 65 years and older experienced an increase in mortality after spending only 2 days on noninvasive oxygenation support while those 64 years and younger experienced an incremental increase in mortality risk up to 7 days where by day 7 the risk of mortality increased significantly. While these results require further study, we suggest that careful consideration be given to the use of noninvasive oxygenation support versus IMV keeping in mind the patient's age and other risk factors. In addition, further research is needed to determine the generalizability of these results to other patient populations with acute respiratory failure from different etiologies.

## Supporting information

**S1 Table. Comparison of patients on mechanical ventilation by the period of admission.** (DOCX)

**S2 Table. Comparison of patients by the number of days on high-flow oxygen before intubation.**

(DOCX)

**Author Contributions****Conceptualization:** Aditya Kasarabada, Linda Henry.**Data curation:** Aditya Kasarabada, Brian Lam.**Formal analysis:** Maria Stepanova.**Funding acquisition:** Aditya Kasarabada, Linda Henry.**Investigation:** Aditya Kasarabada, Kimberly Barker, Theresa Ganoe, Lindsay Clevenger, Cristina Visco, Jessica Gibson, Rahim Karimi.**Methodology:** Aditya Kasarabada.**Project administration:** Aditya Kasarabada, Linda Henry.**Resources:** Aditya Kasarabada, Linda Henry.**Software:** Brian Lam, Maria Stepanova.**Supervision:** Aditya Kasarabada.**Validation:** Aditya Kasarabada, Linda Henry.**Visualization:** Maria Stepanova.**Writing – original draft:** Aditya Kasarabada, Rahim Karimi, Maria Stepanova, Linda Henry.**Writing – review & editing:** Aditya Kasarabada, Kimberly Barker, Theresa Ganoe, Lindsay Clevenger, Cristina Visco, Jessica Gibson, Rahim Karimi, Negar Naderi, Linda Henry, Christopher King, Mehul Desai.**References**

1. CDC. Coronavirus Disease 2019 (COVID-19)—Symptoms. Centers for Disease Control and Prevention. Published February 22, 2021. Accessed October 31, 2021. <https://www.cdc.gov/coronavirus/2019-ncov/symptoms-testing/symptoms.html>.
2. Christensen B, Favaloro EJ, Lippi G, Van Cott EM. Hematology Laboratory Abnormalities in Patients with Coronavirus Disease 2019 (COVID-19). *Semin Thromb Hemost*. 2020; 46(7):845–849. <https://doi.org/10.1055/s-0040-1715458> PMID: 32877961
3. Li H, Liu L, Zhang D, et al. SARS-CoV-2 and viral sepsis: observations and hypotheses. *The Lancet*. 2020; 395(10235):1517–1520. [https://doi.org/10.1016/S0140-6736\(20\)30920-X](https://doi.org/10.1016/S0140-6736(20)30920-X) PMID: 32311318
4. Mason RJ. Pathogenesis of COVID-19 from a cell biologic perspective. *Eur Respir J*. Published online April 9, 2020:2000607. <https://doi.org/10.1183/13993003.00607-2020>
5. McGonagle D, Sharif K, O'Regan A, Bridgewood C. The Role of Cytokines including Interleukin-6 in COVID-19 induced Pneumonia and Macrophage Activation Syndrome-Like Disease. *Autoimmun Rev*. 2020; 19(6):102537. <https://doi.org/10.1016/j.autrev.2020.102537> PMID: 32251717
6. Kuba K, Yamaguchi T, Penninger JM. Angiotensin-Converting Enzyme 2 (ACE2) in the Pathogenesis of ARDS in COVID-19. *Front Immunol*. 2021 Dec 22; 12:732690. <https://doi.org/10.3389/fimmu.2021.732690> PMID: 35003058; PMCID: PMC8727358.
7. Douglas SD, Leeman SE. Neurokinin-1 receptor: functional significance in the immune system in reference to selected infections and inflammation. *Ann N Y Acad Sci*. 2011; 1217:83–95. <https://doi.org/10.1111/j.1749-6632.2010.05826.x> PMID: 21091716

8. Crimi C, Pierucci P, Renda T, Pisani L, Carlucci A. High-Flow Nasal Cannula and COVID-19: A Clinical Review. *Respir Care*. 2022 Feb; 67(2):227–240. <https://doi.org/10.4187/respcare.09056> Epub 2021 Sep 14. PMID: 34521762.
9. Crimi C, Noto A, Cortegiani A, Impellizzeri P, Elliott M, Ambrosino N, et al. Noninvasive oxygenation support in acute hypoxemic respiratory failure associated with COVID-19 and other viral infections. *Minerva Anestesiol*. 2020 Nov; 86(11):1190–1204. <https://doi.org/10.23736/S0375-9393.20.14785-0> Epub 2020 Aug 5. PMID: 32756535.
10. Grieco DL, Menga LS, Cesarano M, Rosà T, Spadaro S, Bitondo MM, et al; COVID-ICU Gemelli Study Group. Effect of Helmet Noninvasive Ventilation vs High-Flow Nasal Oxygen on Days Free of Respiratory Support in Patients With COVID-19 and Moderate to Severe Hypoxemic Respiratory Failure: The HENIVOT Randomized Clinical Trial. *JAMA*. 2021 May 4; 325(17):1731–1743.
11. Perkins GD, Ji C, Connolly BA, Couper K, Lall R, Baillie JK, et al; RECOVERY-RS Collaborators. Effect of Noninvasive Respiratory Strategies on Intubation or Mortality Among Patients With Acute Hypoxemic Respiratory Failure and COVID-19: The RECOVERY-RS Randomized Clinical Trial. *JAMA*. 2022 Feb 8; 327(6):546–558.
12. Ospina-Tascón GA, Calderón-Tapia LE, García AF, Zarama V, Gómez-Álvarez F, Álvarez-Saa T, et al; HiFLo-Covid Investigators. Effect of High-Flow Oxygen Therapy vs Conventional Oxygen Therapy on Invasive Mechanical Ventilation and Clinical Recovery in Patients With Severe COVID-19: A Randomized Clinical Trial. *JAMA*. 2021 Dec 7; 326(21):2161–2171. <https://doi.org/10.1001/jama.2021.20714> Erratum in: *JAMA*. 2022 Mar 15; 327(11):1093. PMID: 34874419
13. Crimi C, Noto A, Madotto F, Ippolito M, Nolasco S, Campisi R, et al; COVID-HIGH Investigators. High-flow nasal oxygen versus conventional oxygen therapy in patients with COVID-19 pneumonia and mild hypoxaemia: a randomised controlled trial. *Thorax*. 2022 May 17; thoraxjnl-2022-218806.
14. Arabi YM, Aldekhyl S, Al Qahtani S, Al-Dorzi HM, Abdukahil SA, Al Harbi MK, et al; Saudi Critical Care Trials Group. Effect of Helmet Noninvasive Ventilation vs Usual Respiratory Support on Mortality Among Patients With Acute Hypoxemic Respiratory Failure Due to COVID-19: The HELMET-COVID Randomized Clinical Trial. *JAMA*. 2022 Sep 20; 328(11):1063–1072.
15. Frat JP, Quenot JP, Badie J, Coudroy R, Guitton C, Ehrmann S, et al; SOHO-COVID Study Group and the REVA Network. Effect of High-Flow Nasal Cannula Oxygen vs Standard Oxygen Therapy on Mortality in Patients With Respiratory Failure Due to COVID-19: The SOHO-COVID Randomized Clinical Trial. *JAMA*. 2022 Sep 27; 328(12):1212–1222.
16. Bouadma L, Mekontso-Dessap A, Burdet C, Merdji H, Poissy J, Dupuis C, et al; COVIDICUS Study Group. High-Dose Dexamethasone and Oxygen Support Strategies in Intensive Care Unit Patients With Severe COVID-19 Acute Hypoxemic Respiratory Failure: The COVIDICUS Randomized Clinical Trial. *JAMA Intern Med*. 2022 Sep 1; 182(9):906–916.
17. Dupuis C, Bouadma L, de Montmollin E, Goldgran-Toledano D, Schwebel C, Reignier J, et al. Association Between Early Invasive Mechanical Ventilation and Day-60 Mortality in Acute Hypoxemic Respiratory Failure Related to Coronavirus Disease-2019 Pneumonia. *Crit Care Explor*. 2021 Jan 22; 3(1): e0329. <https://doi.org/10.1097/CCE.0000000000000329> PMID: 33521646
18. Grieco DL, Menga LS, Eleuteri D, Antonelli M. Patient self-inflicted lung injury: implications for acute hypoxemic respiratory failure and ARDS patients on noninvasive support. *Minerva Anestesiol*. 2019; 85(9):1014–23. <https://doi.org/10.23736/S0375-9393.19.13418-9> PMID: 30871304
19. Clinical care for severe acute respiratory infection: toolkit, update 2022. COVID-19 adaptation. Geneva: World Health Organization; 2022 (WHO/2019- nCoV/SARI\_toolkit/2022.1). Licence: CC BY-NC-SA 3.0 IGO.
20. Weaver L., Das A., Saffaran S. et al. High risk of patient self-inflicted lung injury in COVID-19 with frequently encountered spontaneous breathing patterns: a computational modelling study. *Ann. Intensive Care* 11, 109 (2021). <https://doi.org/10.1186/s13613-021-00904-7> PMID: 34255207
21. Neto AS, Deliberato RO, Johnson AE, Bos LD, Amorim P, Pereira SM, et al. Mechanical power of ventilation is associated with mortality in critically ill patients: an analysis of patients in two observational cohorts. *Intensive Care Med*. 2018; 44(11):1914–22. <https://doi.org/10.1007/s00134-018-5375-6> PMID: 30291378
22. Ni YN, Luo J, Yu H, Liu D, Liang BM, Liang ZA. The effect of high-flow nasal cannula in reducing the mortality and the rate of endotracheal intubation when used before mechanical ventilation compared with conventional oxygen therapy and noninvasive positive pressure ventilation. A systematic review and meta-analysis. *Am J Emerg Med*. 2018; 36(2):226–233. Available at: <https://www.ncbi.nlm.nih.gov/pubmed/28780231>. <https://doi.org/10.1016/j.ajem.2017.07.083> PMID: 28780231
23. Information on covid-19 treatment, prevention and research [Internet]. National Institutes of Health. U. S. Department of Health and Human Services; [cited 2022Oct3]. Available from: <https://www.covid19treatmentguidelines.nih.gov/>.

24. Palaiodimos L, Kokkinidis DG, Li W, Karamanis D, Ognibene J, Arora S, et al. Severe obesity, increasing age and male sex are independently associated with worse in-hospital outcomes, and higher in-hospital mortality, in a cohort of patients with COVID-19 in the Bronx, New York. *Metabolism*. 2020 Jul; 108:154262. <https://doi.org/10.1016/j.metabol.2020.154262> Epub 2020 May 16. PMID: 32422233; PMCID: PMC7228874.
25. Pettit NN, MacKenzie EL, Ridgway JP, Pursell K, Ash D, Patel B, et al. Obesity is Associated with Increased Risk for Mortality Among Hospitalized Patients with COVID-19. *Obesity (Silver Spring)*. 2020 Oct; 28(10):1806–1810. <https://doi.org/10.1002/oby.22941> Epub 2020 Aug 25. PMID: 32589784; PMCID: PMC7362135.
26. Klang E, Kassim G, Soffer S, Freeman R, Levin MA, Reich DL. Severe Obesity as an Independent Risk Factor for COVID-19 Mortality in Hospitalized Patients Younger than 50. *Obesity (Silver Spring)*. 2020 Sep; 28(9):1595–1599. <https://doi.org/10.1002/oby.22913> Epub 2020 Aug 2. PMID: 32445512; PMCID: PMC7283736.
27. Coppack SW. Pro-inflammatory cytokines and adipose tissue. *Proceedings of the Nutrition Society* 2001; 60: 349–356. <https://doi.org/10.1079/pns2001110> PMID: 11681809
28. Parameswaran K, Todd DC, Soth M. Altered respiratory physiology in obesity. *Canadian respiratory journal* 2006; 13: 203–210. <https://doi.org/10.1155/2006/834786> PMID: 16779465
29. Kassir R. Risk of COVID-19 for patients with obesity. *Obesity Reviews* 2020. <https://doi.org/10.1111/obr.13034> PMID: 32281287
30. Ryan PM, Caplice NM. Is Adipose Tissue a Reservoir for Viral Spread, Immune Activation and Cytokine Amplification in COVID-19. *Obesity* 2020.
31. Covid Data Tracker Weekly Review [Internet]. Centers for Disease Control and Prevention. Centers for Disease Control and Prevention; [cited 2022Oct3]. Available from: <https://www.cdc.gov/coronavirus/2019-ncov/covid-data/covidview/index.html>.
32. Kang BJ, Koh Y, Lim C-M, Huh JW, Baek S, Han M, et al. Failure of high-flow nasal cannula therapy may delay intubation and increase mortality. *Intensive Care Med* 2015; 41(4):623–632. <https://doi.org/10.1007/s00134-015-3693-5> PMID: 25691263
33. Saillard C, Lambert J, Tramier M, Chow-Chine L, Bisbal M, Servan L, et al. High-flow nasal cannula failure in critically ill cancer patients with acute respiratory failure: Moving from avoiding intubation to avoiding delayed intubation. *PLoS One*. 2022 Jun 29; 17(6):e0270138. <https://doi.org/10.1371/journal.pone.0270138> PMID: 35767521
